# Supplementary material for: Targeted Profiling of Immunological Genes during Norovirus Replication in Human Intestinal Enteroids
Source: PubMed Central journal article supplement (PMC7910953; doi:10.3390/v13020155), 2021-01-21
Supplement: viruses-13-00155-s001.pdf [file viruses-13-00155-s001.pdf]

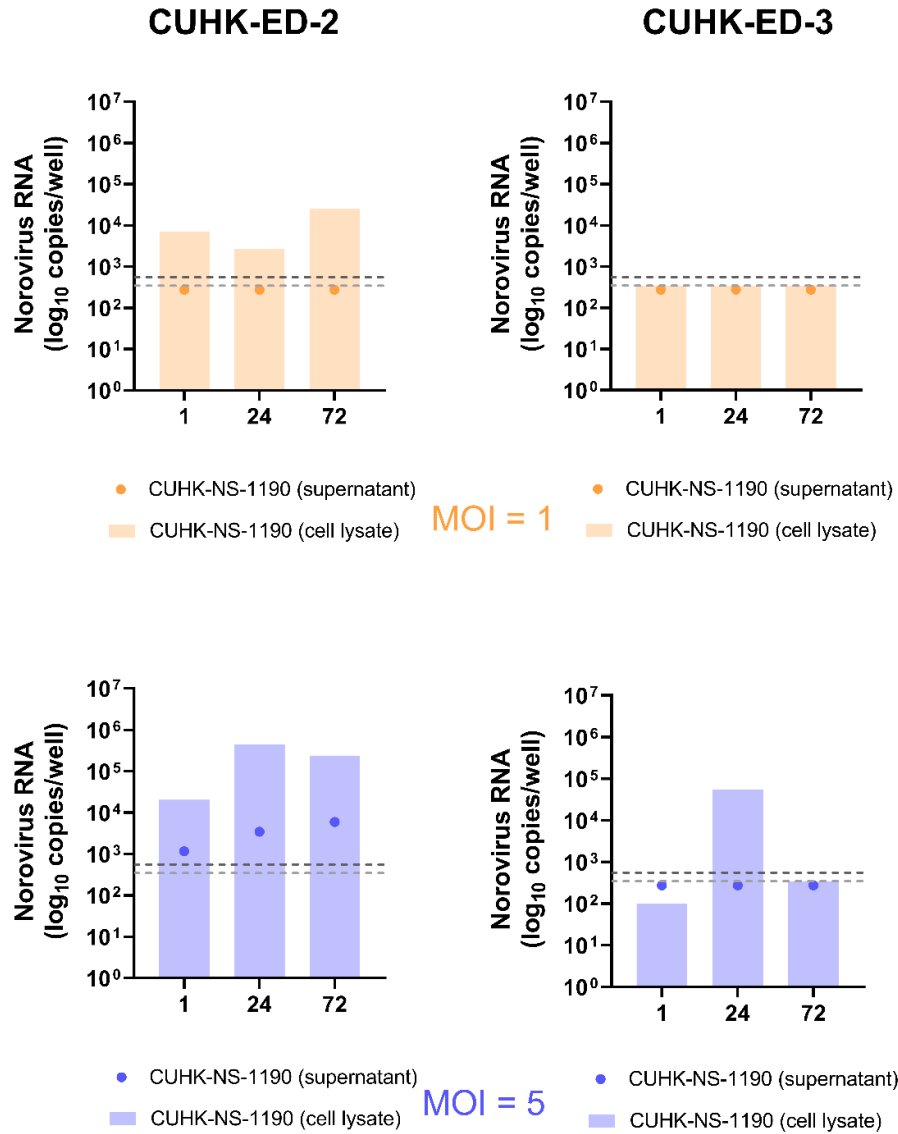

**Figure S1.** Monolayer of each human intestinal enteroids lines were inoculated at a multiplicity of infection of 1 and 5 ( $5.7 \times 10^4$  and  $2.8 \times 10^5$  genome equivalents/well, respectively) with CUHK-NS-1190. Noroviral RNA was extracted from supernatant and cell lysates collected at 1, 24 and 72 hours post-inoculation (hpi), viral RNA copies per well were obtained by quantitative reverse transcription polymerase chain reaction (RT-qPCR). The horizontal grey and silver dotted line indicates the lower detection limit of RT-qPCR at 552 copies per well of supernatant and 342 copies per well of cell lysates, respectively.

**Table S1.** Cell markers used in quantification of gene expression of six intestinal epithelial cell types by TaqMan Gene Expression Assays.

| Cell type             | Target                                                    | Gene  | Assay reference | Supplier      |
|-----------------------|-----------------------------------------------------------|-------|-----------------|---------------|
| Stem cells            | Leucin-rich-repeat-containing G-protein-couple receptor 5 | LGR5  | Hs00969422_m1   | Thermo Fisher |
| Enterocytes           | Sucrose isomaltase                                        | SI    | Hs00356112_m1   | Thermo Fisher |
| Enteroendocrine cells | Chromogranin A                                            | CHGA  | Hs00900370_m1   | Thermo Fisher |
| Goblet cells          | Mucin 2                                                   | MUC2  | Hs00159374_m1   | Thermo Fisher |
| Paneth cells          | Defensin 5                                                | DEFA5 | Hs00360716_m1   | Thermo Fisher |
| Tuft cells            | doublecortin like kinase 1                                | DCLK1 | Hs00178027_m1   | Thermo Fisher |

**Table S2.** Multivariate linear regression analysis of gene expression of CXCL10 with cell-associated noroviral RNA level.

**Coefficients<sup>a</sup>**

| Model |                              | Unstandardized Coefficients |            | Standardized Coefficients | t      | Sig. |
|-------|------------------------------|-----------------------------|------------|---------------------------|--------|------|
|       |                              | B                           | Std. Error | Beta                      |        |      |
| 1     | (Constant)                   | 53.321                      | 144.361    |                           | .369   | .716 |
|       | HIE_line                     | 20.321                      | 51.712     | .097                      | .393   | .699 |
|       | Strain                       | -57.902                     | 37.835     | -.277                     | -1.530 | .142 |
|       | Time_point                   | -.849                       | .712       | -.241                     | -1.192 | .248 |
|       | Noroviral_RNA_fold_change_CP | 1.009                       | .389       | .686                      | 2.590  | .018 |

a. Dependent Variable: CXCL10\_fold\_change

**Table S3.** Multivariate linear regression analysis of gene expression of IFI44L with cell-associated noroviral RNA level.

**Coefficients<sup>a</sup>**

| Model |                              | Unstandardized Coefficients |            | Standardized Coefficients | t      | Sig. |
|-------|------------------------------|-----------------------------|------------|---------------------------|--------|------|
|       |                              | B                           | Std. Error | Beta                      |        |      |
| 1     | (Constant)                   | 37.540                      | 278.761    |                           | .135   | .897 |
|       | HIE_line                     | 58.300                      | 99.856     | .184                      | .584   | .578 |
|       | Strain                       | -105.183                    | 73.059     | -.332                     | -1.440 | .193 |
|       | Time_point                   | -1.738                      | 1.375      | -.325                     | -1.264 | .247 |
|       | Noroviral_RNA_fold_change_CP | 2.065                       | .752       | .926                      | 2.745  | .029 |

a. Dependent Variable: IFI44L\_fold\_change

**Table S4.** Multivariate linear regression analysis of secretion of CXCL10 with supernatant and cell-associated noroviral RNA level.

**Coefficients<sup>a</sup>**

| Model |                  | Unstandardized Coefficients |            | Standardized Coefficients | t      | Sig. |
|-------|------------------|-----------------------------|------------|---------------------------|--------|------|
|       |                  | B                           | Std. Error | Beta                      |        |      |
| 1     | (Constant)       | 14.108                      | 17.653     |                           | .799   | .455 |
|       | HIE_line         | 4.610                       | 6.125      | .046                      | .753   | .480 |
|       | Strain           | -.212                       | 4.113      | -.002                     | -.052  | .960 |
|       | Time_point       | .089                        | .102       | .053                      | .877   | .414 |
|       | Noroviral_RNA_CP | -2.110E-5                   | .000       | -.352                     | -5.407 | .002 |
|       | Noroviral_RNA_SN | .001                        | .000       | 1.205                     | 14.586 | .000 |

a. Dependent Variable: CXCL10\_ELISA
